# Supplementary material for: Long-term outcomes in patients with polyarticular juvenile idiopathic arthritis receiving adalimumab with or without methotrexate
Source: PubMed Central journal article supplement (PMC7425194; doi:10.1136/rmdopen-2020-001208), 2020-07-13

**Supplemental Table 1. Incidence of Adverse Events Among Patients Receiving and Not Receiving Methotrexate**

|                                      | <b>MTX Use</b> | <b>Non-MTX Use</b> | <b>Patients</b> |
|--------------------------------------|----------------|--------------------|-----------------|
| <b>AE, n (%)</b>                     | <b>n=85</b>    | <b>n=86</b>        | <b>(N=171)</b>  |
| Any AE                               | 74 (87.1)      | 71 (82.6)          | 145 (84.8)      |
| AE possibly drug related             | 53 (62.4)      | 55 (64.0)          | 108 (63.2)      |
| Serious AE                           | 3 (3.5)        | 5 (5.8)            | 8 (4.7)         |
| Severe AE                            | 5 (5.9)        | 5 (5.8)            | 10 (5.8)        |
| AE leading to discontinuation        | 2 (2.4)        | 7 (8.1)            | 9 (5.3)         |
| Infection                            | 34 (40.0)      | 38 (44.2)          | 72 (42.1)       |
| Serious infection                    | 0              | 2 (2.3)            | 2 (1.2)         |
| Opportunistic infection*             | 0              | 0                  | 0               |
| Malignancy                           | 0              | 0                  | 0               |
| Injection site reaction              | 35 (41.2)      | 37 (43.0)          | 72 (42.1)       |
| Death                                | 0              | 0                  | 0               |
| <b>AEs in ≥5% of patients, n (%)</b> |                |                    |                 |
| Injection site pain                  | 22 (25.9)      | 26 (30.2)          | 48 (28.1)       |
| Injection site reaction              | 15 (17.6)      | 12 (14.0)          | 27 (15.8)       |
| Headache                             | 8 (9.4)        | 8 (9.3)            | 16 (9.4)        |
| Upper respiratory tract<br>infection | 6 (7.1)        | 9 (10.5)           | 15 (8.8)        |
| Contusion                            | 9 (10.6)       | 5 (5.8)            | 14 (8.2)        |
| Viral infection                      | 6 (7.1)        | 7 (8.1)            | 13 (7.6)        |
| Nausea                               | 6 (7.1)        | 5 (5.8)            | 11 (6.4)        |

|                    |         |         |          |
|--------------------|---------|---------|----------|
| Rash               | 6 (7.1) | 5 (5.8) | 11 (6.4) |
| Juvenile arthritis | 2 (2.4) | 8 (9.3) | 10 (5.8) |
| Hypersensitivity   | 6 (7.1) | 4 (4.7) | 10 (5.8) |
| Arthropod bite     | 6 (7.1) | 4 (4.7) | 10 (5.8) |
| Cough              | 5 (5.9) | 4 (4.7) | 9 (5.3)  |
| Oropharyngeal pain | 2 (2.4) | 7 (8.1) | 9 (5.3)  |

---

AE, adverse event; MTX, methotrexate.

\*Including tuberculosis.

**Supplemental Table 2. Overview of Treatment-Emergent AEs by AAA Status in the Open-Label Lead-in Phase**

| <b>n (%)</b>                                         | <b>With methotrexate</b> |                        | <b>Without methotrexate</b> |                        |
|------------------------------------------------------|--------------------------|------------------------|-----------------------------|------------------------|
|                                                      | <b>AAA+<br/>(n=4)</b>    | <b>AAA-<br/>(n=81)</b> | <b>AAA+<br/>(n=15)</b>      | <b>AAA-<br/>(n=71)</b> |
| AE                                                   | 4 (100)                  | 70 (86.4)              | 15 (100)                    | 56 (78.9)              |
| Serious AE                                           | 0 (0)                    | 3 (3.7)                | 1 (6.7)                     | 4 (5.6)                |
| Severe AE                                            | 0 (0)                    | 5 (6.2)                | 1 (6.7)                     | 3 (4.2)                |
| AE leading to discontinuation of study drug          | 0 (0)                    | 2 (2.5)                | 1 (6.7)                     | 6 (8.5)                |
| AE at least possibly drug-related                    | 3 (75.0)                 | 50 (61.7)              | 9 (60.0)                    | 46 (64.8)              |
| Infectious AE                                        | 0 (0)                    | 37 (45.7)              | 6 (40.0)                    | 33 (46.5)              |
| Serious infectious AE                                | 0 (0)                    | 0 (0)                  | 0 (0)                       | 2 (2.8)                |
| AE of malignant neoplasms                            | 0 (0)                    | 0 (0)                  | 0 (0)                       | 0 (0)                  |
| Injection site reaction related AE                   | 2 (50.0)                 | 33 (40.7)              | 6 (40.0)                    | 31 (43.7)              |
| AE of immunologic reaction                           | 0 (0)                    | 7 (8.6)                | 3 (20.0)                    | 2 (2.8)                |
| AE of opportunistic infection including tuberculosis | 0 (0)                    | 0 (0)                  | 0 (0)                       | 0 (0)                  |
| Death                                                | 0 (0)                    | 0 (0)                  | 0 (0)                       | 0 (0)                  |

AAA, anti-drug antibody; AE, adverse event.

**Supplemental Table 3. Overview of Treatment-Emergent AEs by AAA Status and Methotrexate Use in the Double-Blind Period**

| Patients With:                                       | With methotrexate<br>n (%) |                     |                   |                      | Without methotrexate<br>n (%) |                      |                   |                      |
|------------------------------------------------------|----------------------------|---------------------|-------------------|----------------------|-------------------------------|----------------------|-------------------|----------------------|
|                                                      | AAA+                       |                     | AAA-              |                      | AAA+                          |                      | AAA-              |                      |
|                                                      | Placebo<br>(n=1)           | Adalimumab<br>(n=2) | Placebo<br>(n=36) | Adalimumab<br>(n=36) | Placebo<br>(n=1)              | Adalimumab<br>(n=12) | Placebo<br>(n=27) | Adalimumab<br>(n=18) |
| AE                                                   | 0 (0)                      | 1 (50.0)            | 27 (75.0)         | 31 (86.1)            | 1 (100)                       | 12 (100)             | 20 (74.1)         | 16 (88.9)            |
| Serious AE                                           | 0 (0)                      | 0 (0)               | 2 (5.6)           | 3 (8.3)              | 0 (0)                         | 1 (8.3)              | 0 (0)             | 0 (0)                |
| Severe AE                                            | 0 (0)                      | 0 (0)               | 0 (0)             | 2 (5.6)              | 0 (0)                         | 0 (0)                | 0 (0)             | 1 (5.6)              |
| AE leading to discontinuation of study drug          | 0 (0)                      | 0 (0)               | 0 (0)             | 0 (0)                | 0 (0)                         | 0 (0)                | 0 (0)             | 0 (0)                |
| AE at least possibly drug-related                    | 0 (0)                      | 1 (50.0)            | 15 (41.7)         | 21 (58.3)            | 0 (0)                         | 5 (41.7)             | 9 (33.3)          | 11 (61.1)            |
| Infectious AE                                        | 0 (0)                      | 0 (0)               | 19 (52.8)         | 22 (61.1)            | 0 (0)                         | 8 (66.7)             | 11 (40.7)         | 11 (61.1)            |
| Serious infectious AE                                | 0 (0)                      | 0 (0)               | 0 (0)             | 1 (2.8)              | 0 (0)                         | 1 (8.3)              | 0 (0)             | 0 (0)                |
| AE of malignant neoplasms                            | 0 (0)                      | 0 (0)               | 0 (0)             | 0 (0)                | 0 (0)                         | 0 (0)                | 0 (0)             | 0 (0)                |
| Injection site reaction related AE                   | 0 (0)                      | 1 (50.0)            | 9 (25.0)          | 13 (36.1)            | 0 (0)                         | 3 (25.0)             | 4 (14.8)          | 8 (44.4)             |
| AE of immunologic reaction                           | 0 (0)                      | 0 (0)               | 0 (0)             | 2 (5.6)              | 0 (0)                         | 1 (8.3)              | 0 (0)             | 2 (11.1)             |
| AE of opportunistic infection including tuberculosis | 0 (0)                      | 0 (0)               | 0 (0)             | 0 (0)                | 0 (0)                         | 0 (0)                | 0 (0)             | 0 (0)                |
| Death                                                | 0 (0)                      | 0 (0)               | 0 (0)             | 0 (0)                | 0 (0)                         | 0 (0)                | 0 (0)             | 0 (0)                |

AAA, anti-drug antibody; AE, adverse event.

**Supplemental Figure 1.** Study schematic. ADA, adalimumab; BSA, body surface area; eow, every other week; MTX, methotrexate.

\*BSA dosing eow for 44–136 weeks. †Fixed dosing (<30 kg: 20 mg eow; ≥30 kg: 40 mg eow) thereafter.

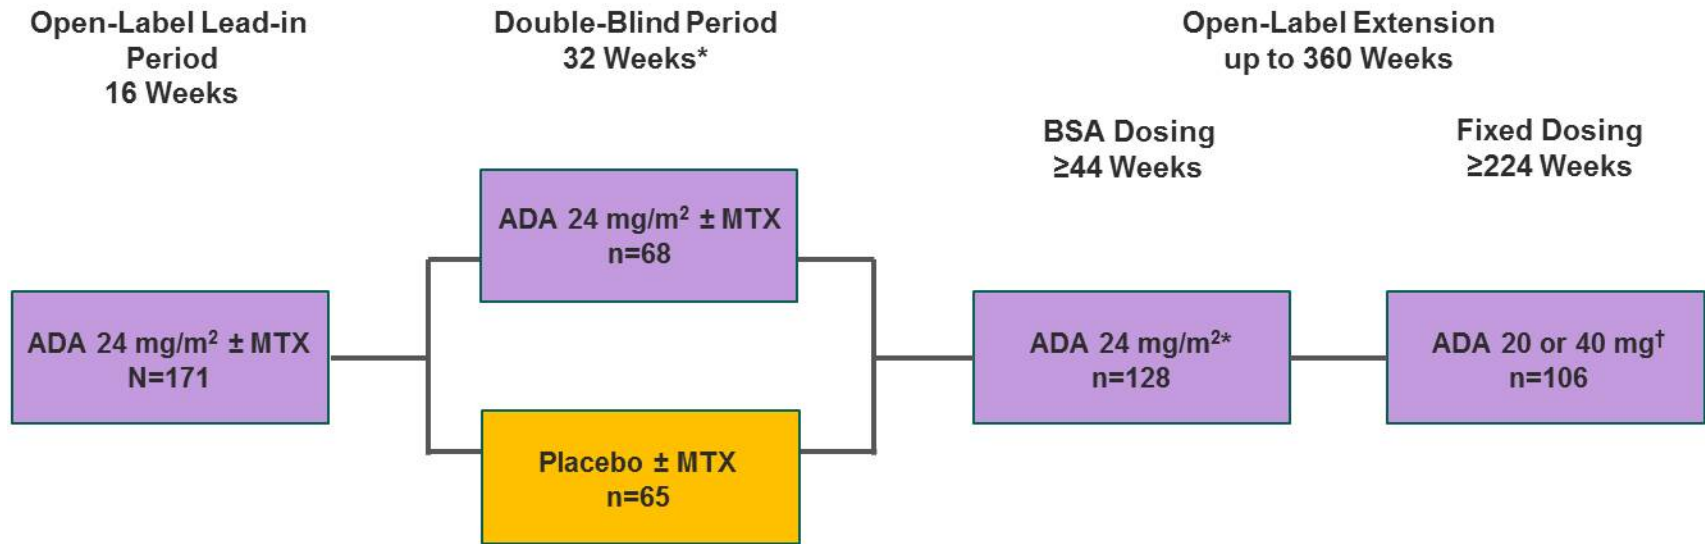

**Supplemental Figure 2.** Percentage of Patients Achieving JIA ACR 30/50/70/90 Over Time Stratified by Concomitant MTX Use. JIA ACR 30/50/70/90, 30%, 50%, 70%, or 90% improvement in the Pediatric American College of Rheumatology response; MTX, methotrexate; NRI, non-responder imputation. Closed symbols=observed analysis. Open symbols=NRI analysis. For observed analysis, n values are shown for weeks 0, 104, 200, and 312; for NRI analysis, N=85 (MTX) and N=86 (non-MTX).

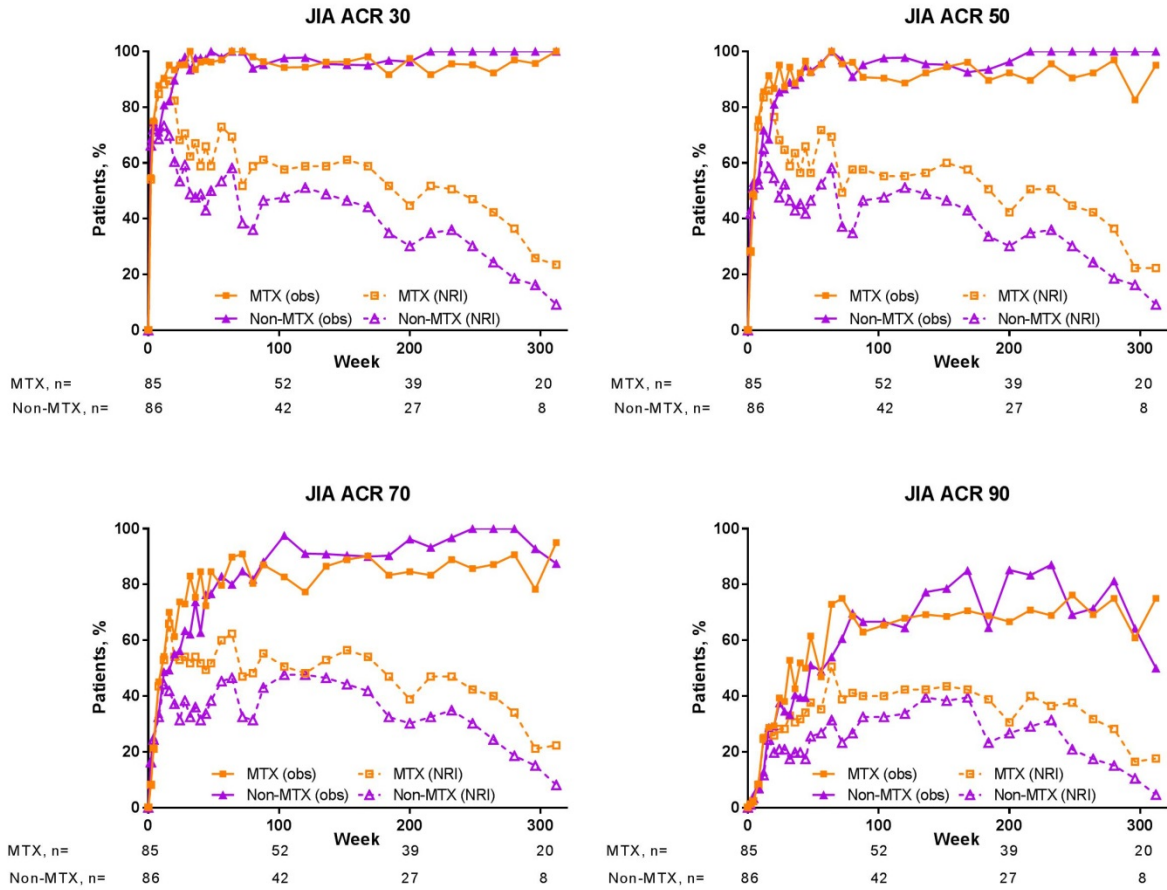

**Supplemental Figure 3.** Percentage of Patients Achieving (A) JADAS27 LDA and JADAS27 Inactive Disease and (B) Mean JADAS27 LDA and CHAQ-DI Over Time Stratified by MTX Use. Closed symbols=observed analysis. Open symbols=NRI and LOCF analyses. CHAQ-DI, Childhood Health Assessment Questionnaire Disability Index; ID, inactive disease; JADAS27, 27-joint Juvenile Arthritis Disease Activity Score; LDA, low disease activity; LOCF, last observation carried forward; MTX, methotrexate; NRI, non-responder imputation. For observed analysis, n values are shown for weeks 0, 104, 200, and 312; for NRI and LOCF analyses, N=85 (MTX) and N=86 (non-MTX). In panel B mean JADAS27 panel, dotted lines represent JADAS27 LDA ( $\leq 3.8$ ) and JADAS ID ( $\leq 1$ ) cutoffs.

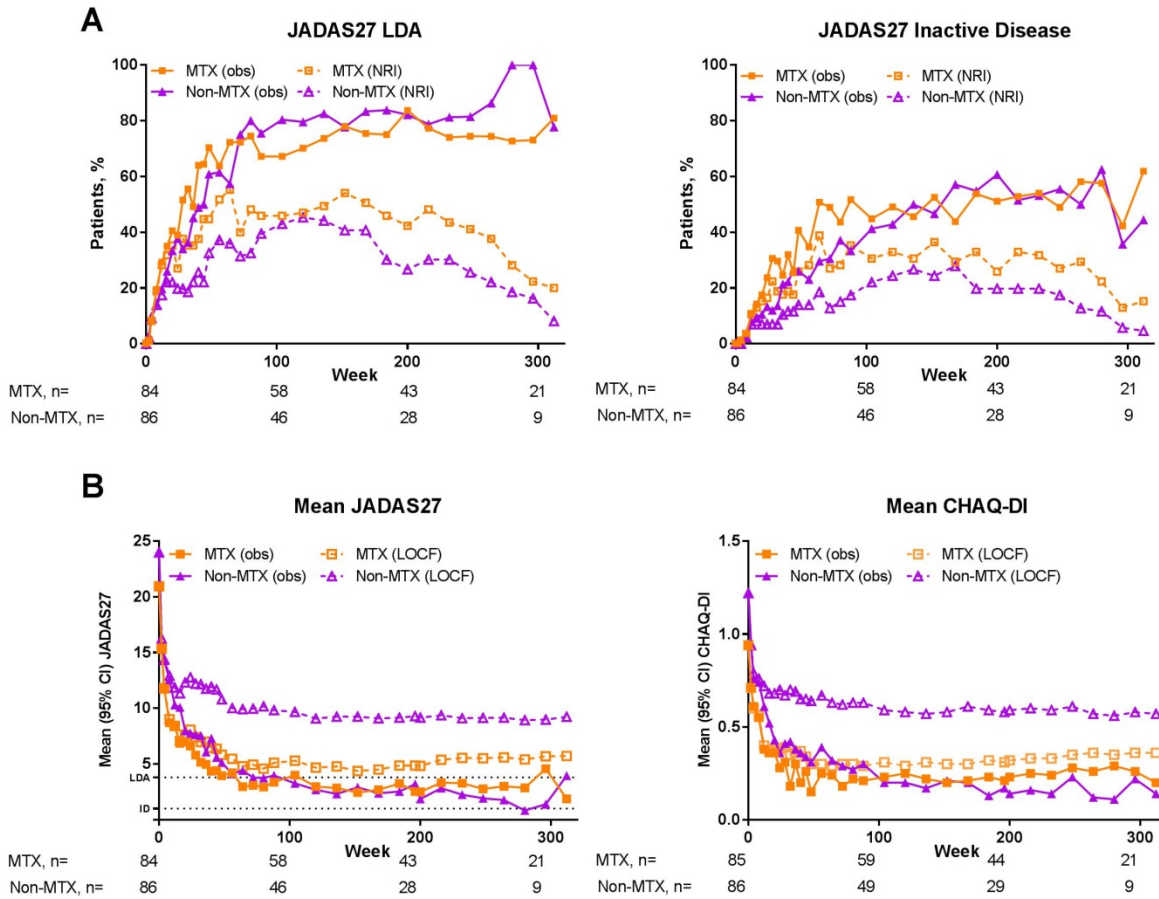

**Supplemental Figure 4.** Percentage of patients achieving (A) JADAS27 clinical remission over time and (B) regression tree analysis selecting JIA ACR 90 response at week 12 as a significant factor associated with JADAS27 clinical remission. JIA ACR 90, 90% improvement in the Pediatric American College of Rheumatology response. JADAS27, 27-joint Juvenile Arthritis Disease Activity Score; NRI, non-responder imputation. Regression tree analysis: 10 patients with missing JIA ACR 90 status at week 12 were excluded. For observed analysis, n values are shown for weeks 28, 104, 200, and 312; for NRI analysis, N=171.

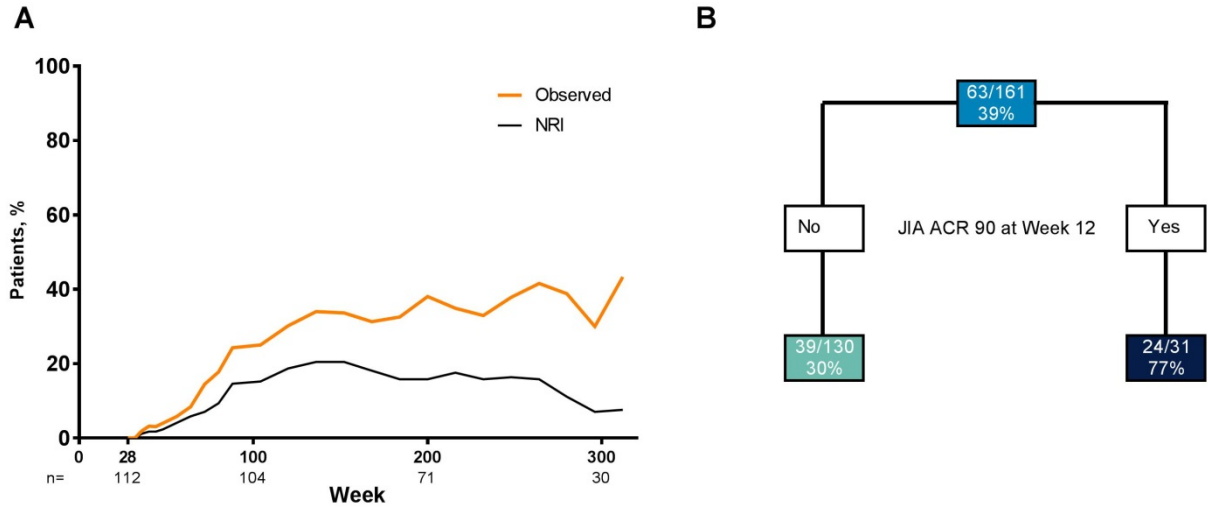

Supplement: rmdopen-2020-001208s022.pdf [file rmdopen-2020-001208s022.pdf]
